# Supplementary material
Source: MDPI journal article supplement (https://www.mdpi.com/2673-401X/3/4/31)

# Synthesis of 3-Hydroxy-9*H*-fluorene-2-carboxylates via Michael reaction, Robinson annulation and Aromatization

Yu-Min Wang, Yi-Hung Liu and Shiuh-Tzung Liu\*

Department of Chemistry, National Taiwan University, Taipei, Taiwan 10617

## Supplementary Materials

### Contents

|                                                                                  |     |
|----------------------------------------------------------------------------------|-----|
| Table S1. Crystal Data of <b>2a</b> .....                                        | S1  |
| Table S2. Summary of Oxidation study of <b>2a</b> and <b>3a</b> .....            | S2  |
| Figure S1 <sup>1</sup> H NMR and <sup>13</sup> C NMR spectra of <b>4a</b> .....  | S3  |
| Figure S2 <sup>1</sup> H NMR and <sup>13</sup> C NMR spectra of <b>4b</b> .....  | S4  |
| Figure S3 <sup>1</sup> H NMR and <sup>13</sup> C NMR spectra of <b>4c</b> .....  | S5  |
| Figure S4 <sup>1</sup> H NMR and <sup>13</sup> C NMR spectra of <b>4d</b> .....  | S6  |
| Figure S5 <sup>1</sup> H NMR and <sup>13</sup> C NMR spectra of <b>4e</b> .....  | S7  |
| Figure S6 <sup>1</sup> H NMR and <sup>13</sup> C NMR spectra of <b>4f</b> .....  | S8  |
| Figure S7 <sup>1</sup> H NMR and <sup>13</sup> C NMR spectra of <b>4g</b> .....  | S9  |
| Figure S8 <sup>1</sup> H NMR and <sup>13</sup> C NMR spectra of <b>4i</b> .....  | S10 |
| Figure S9 <sup>1</sup> H NMR and <sup>13</sup> C NMR spectra of <b>4j</b> .....  | S11 |
| Figure S10 <sup>1</sup> H NMR and <sup>13</sup> C NMR spectra of <b>4k</b> ..... | S12 |
| Figure S11 <sup>1</sup> H NMR and <sup>13</sup> C NMR spectra of <b>4l</b> ..... | S13 |

Table S1 Crystal data of **2a**

|                                   |                                                |               |  |
|-----------------------------------|------------------------------------------------|---------------|--|
| Empirical formula                 | C <sub>22</sub> H <sub>20</sub> O <sub>3</sub> |               |  |
| Formula weight                    | 332.38                                         |               |  |
| Crystal system                    | Monoclinic                                     |               |  |
| Space group                       | P2 <sub>1</sub> /c                             |               |  |
| Unit cell dimensions              | a = 14.0692(15) Å                              | α= 90°.       |  |
|                                   | b = 7.0376(6) Å                                | β= 91.234(8)° |  |
|                                   | c = 17.1586(13) Å                              | γ = 90°.      |  |
| Volume                            | 1698.5(3) Å <sup>3</sup>                       |               |  |
| Z                                 | 4                                              |               |  |
| F(000)                            | 704                                            |               |  |
| Density (calculated)              | 1.300 Mg/m <sup>3</sup>                        |               |  |
| Wavelength                        | 0.71073 Å                                      |               |  |
| Cell parameters reflections used  | 4483                                           |               |  |
| Theta range for Cell parameters   | 4.3740 to 29.4510°.                            |               |  |
| Absorption coefficient            | 0.085 mm <sup>-1</sup>                         |               |  |
| Temperature                       | 100(2) K                                       |               |  |
| Crystal size                      | 0.25 x 0.20 x 0.15 mm <sup>3</sup>             |               |  |
| Data collection                   |                                                |               |  |
| Diffractometer                    | Xcalibur, Atlas, Gemini                        |               |  |
| Absorption correction             | Semi-empirical from equivalents                |               |  |
| Max. and min. transmission        | 1.00000 and 0.85961                            |               |  |
| No. of measured reflections       | 12742                                          |               |  |
| No. of independent reflections    | 3887 [R(int) = 0.0395]                         |               |  |
| No. of observed [I>2_igma(I)]     | 2995                                           |               |  |
| Completeness to theta = 25.242°   | 99.8 %                                         |               |  |
| Theta range for data collection   | 3.129 to 27.494°.                              |               |  |
| Refinement                        |                                                |               |  |
| Final R indices [I>2sigma(I)]     | R1 = 0.0470, wR2 = 0.1341                      |               |  |
| R indices (all data)              | R1 = 0.0636, wR2 = 0.1551                      |               |  |
| Goodness-of-fit on F <sup>2</sup> | 1.022                                          |               |  |
| No. of reflections                | 3887                                           |               |  |
| No. of parameters                 | 226                                            |               |  |
| No. of restraints                 | 0                                              |               |  |
| Largest diff. peak and hole       | 0.228 and -0.259 e.Å <sup>-3</sup>             |               |  |

Table S2 Summary of Oxidation study of **2a** and **3a**<sup>1</sup>

| entry | Substrate/oxidant                                | conditions                                                  | Yield of <b>4a</b> |
|-------|--------------------------------------------------|-------------------------------------------------------------|--------------------|
| 1     | <b>2a</b> / H <sub>2</sub> O <sub>2</sub> (2 eq) | THF/refluxing/24 h                                          | trace              |
| 2     | <b>2a</b> / MnO <sub>2</sub> (2 eq)              | THF/refluxing/rt                                            | mixture            |
| 3     | <b>2a</b> / O <sub>2</sub> (1 atm)               | <i>t</i> -BuOK(1 eq)/dioxane/80 °C/24 h                     | 36%                |
| 4     | <b>3a</b> / O <sub>2</sub> (1 atm)               | <i>t</i> -BuOK(1 eq)/dioxane/80 °C/24 h                     | 8%                 |
| 5     | <b>3a</b> /DDQ (1.1 eq)                          | dioxane/100 °C/3 h                                          | 13%                |
| 6     | <b>3a</b> /DDQ (1.1 eq)                          | H <sub>2</sub> SO <sub>4</sub> (0.3 eq)/ dioxane/100 °C/3 h | 100%               |
| 7     | <b>2a</b> /DDQ (1.1 eq)                          | H <sub>2</sub> SO <sub>4</sub> (0.3 eq)/ dioxane/100 °C/3 h | 50%                |

<sup>1</sup> Substrate **2a** or **3a** (20 mg, 0.06 mmol)

Figure S1  $^1\text{H}$  NMR and  $^{13}\text{C}$  NMR spectra of **4a**

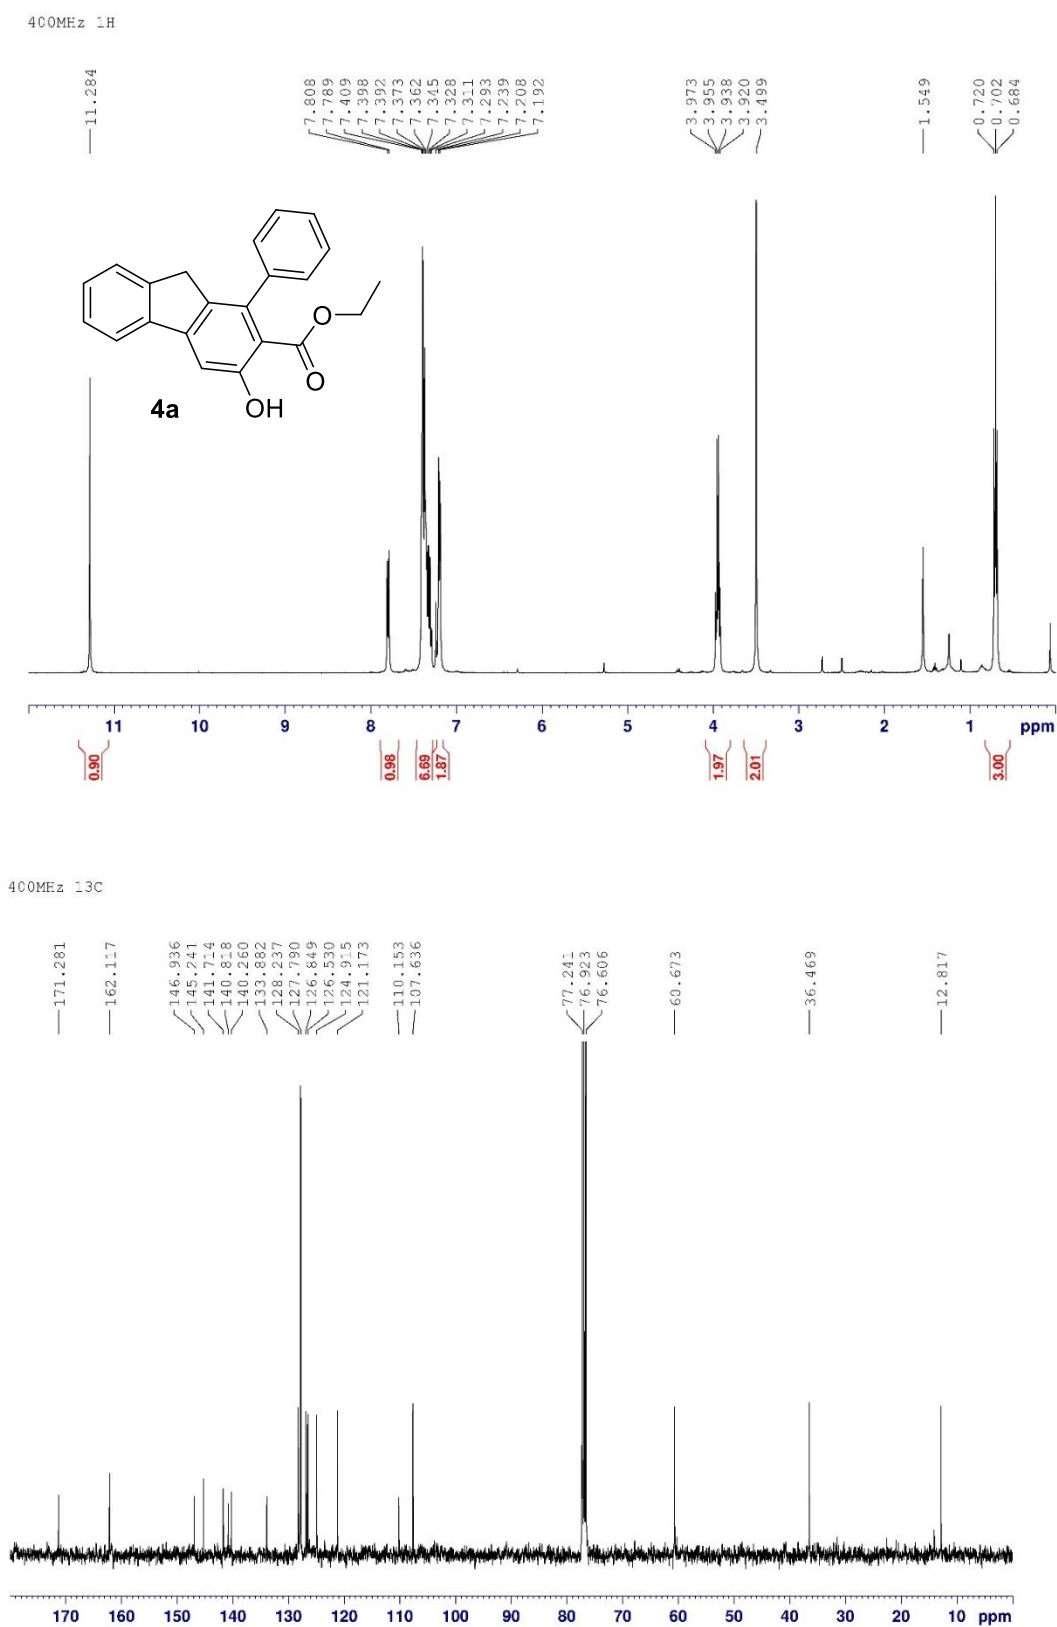

Figure S2  $^1\text{H}$  NMR and  $^{13}\text{C}$  NMR spectra of **4b**

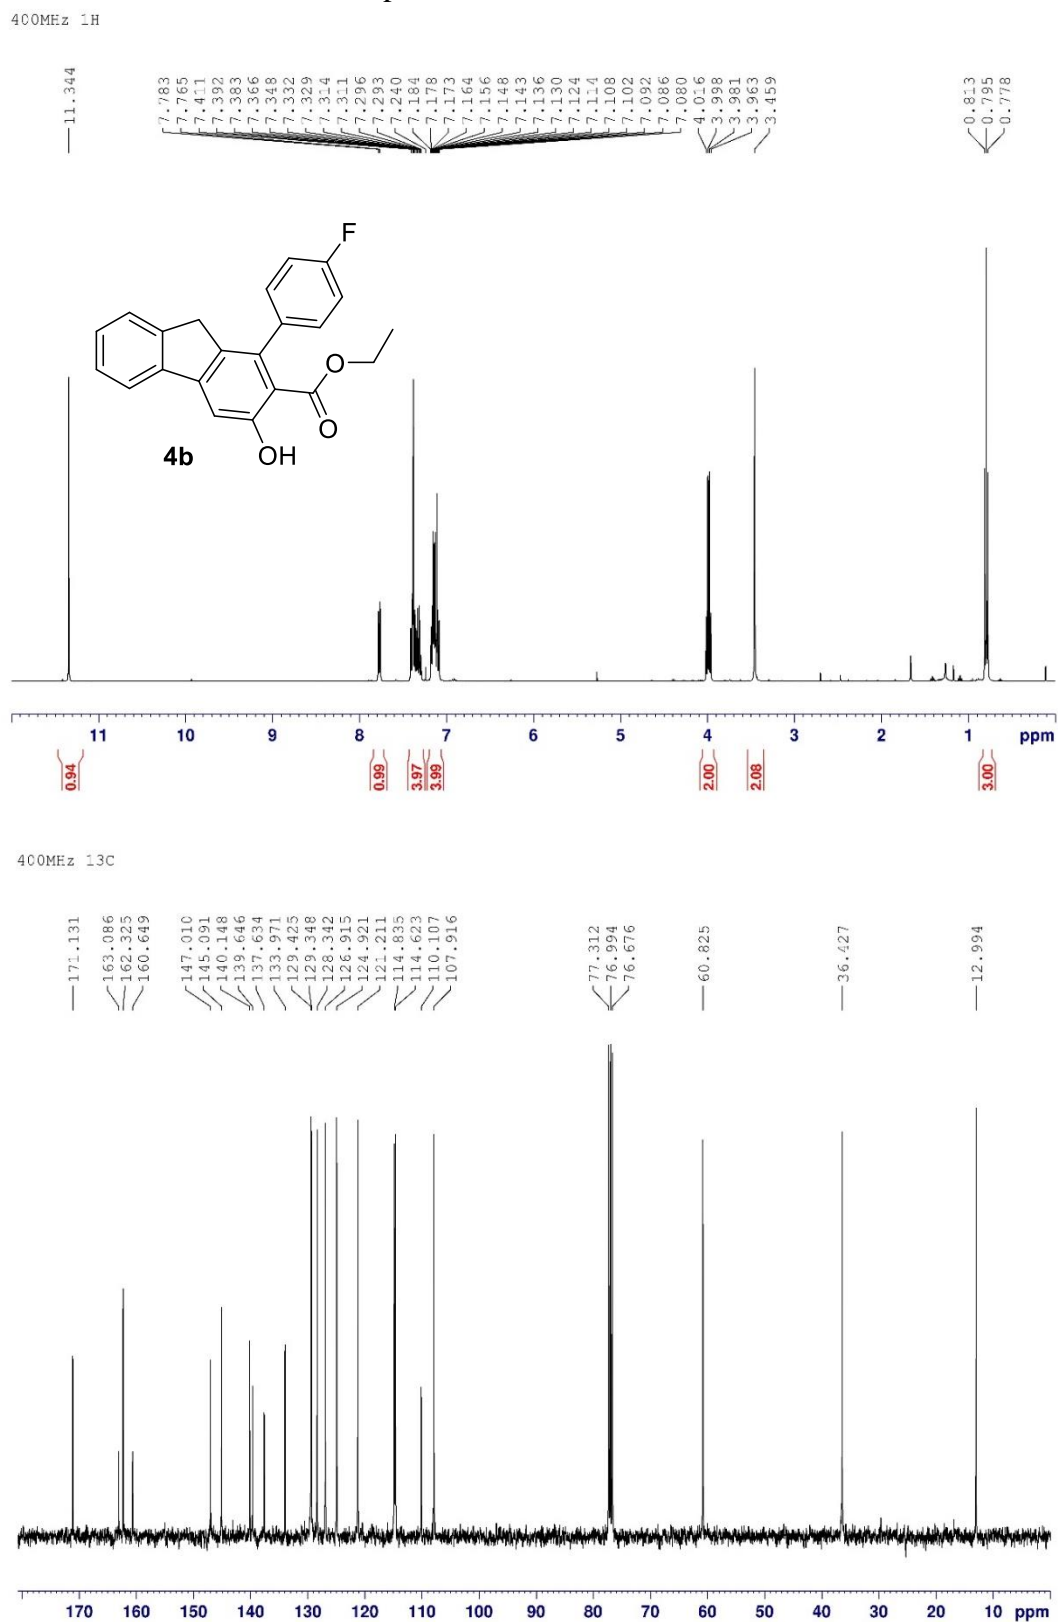

Figure S3  $^1\text{H}$  NMR and  $^{13}\text{C}$  NMR spectra of **4c**

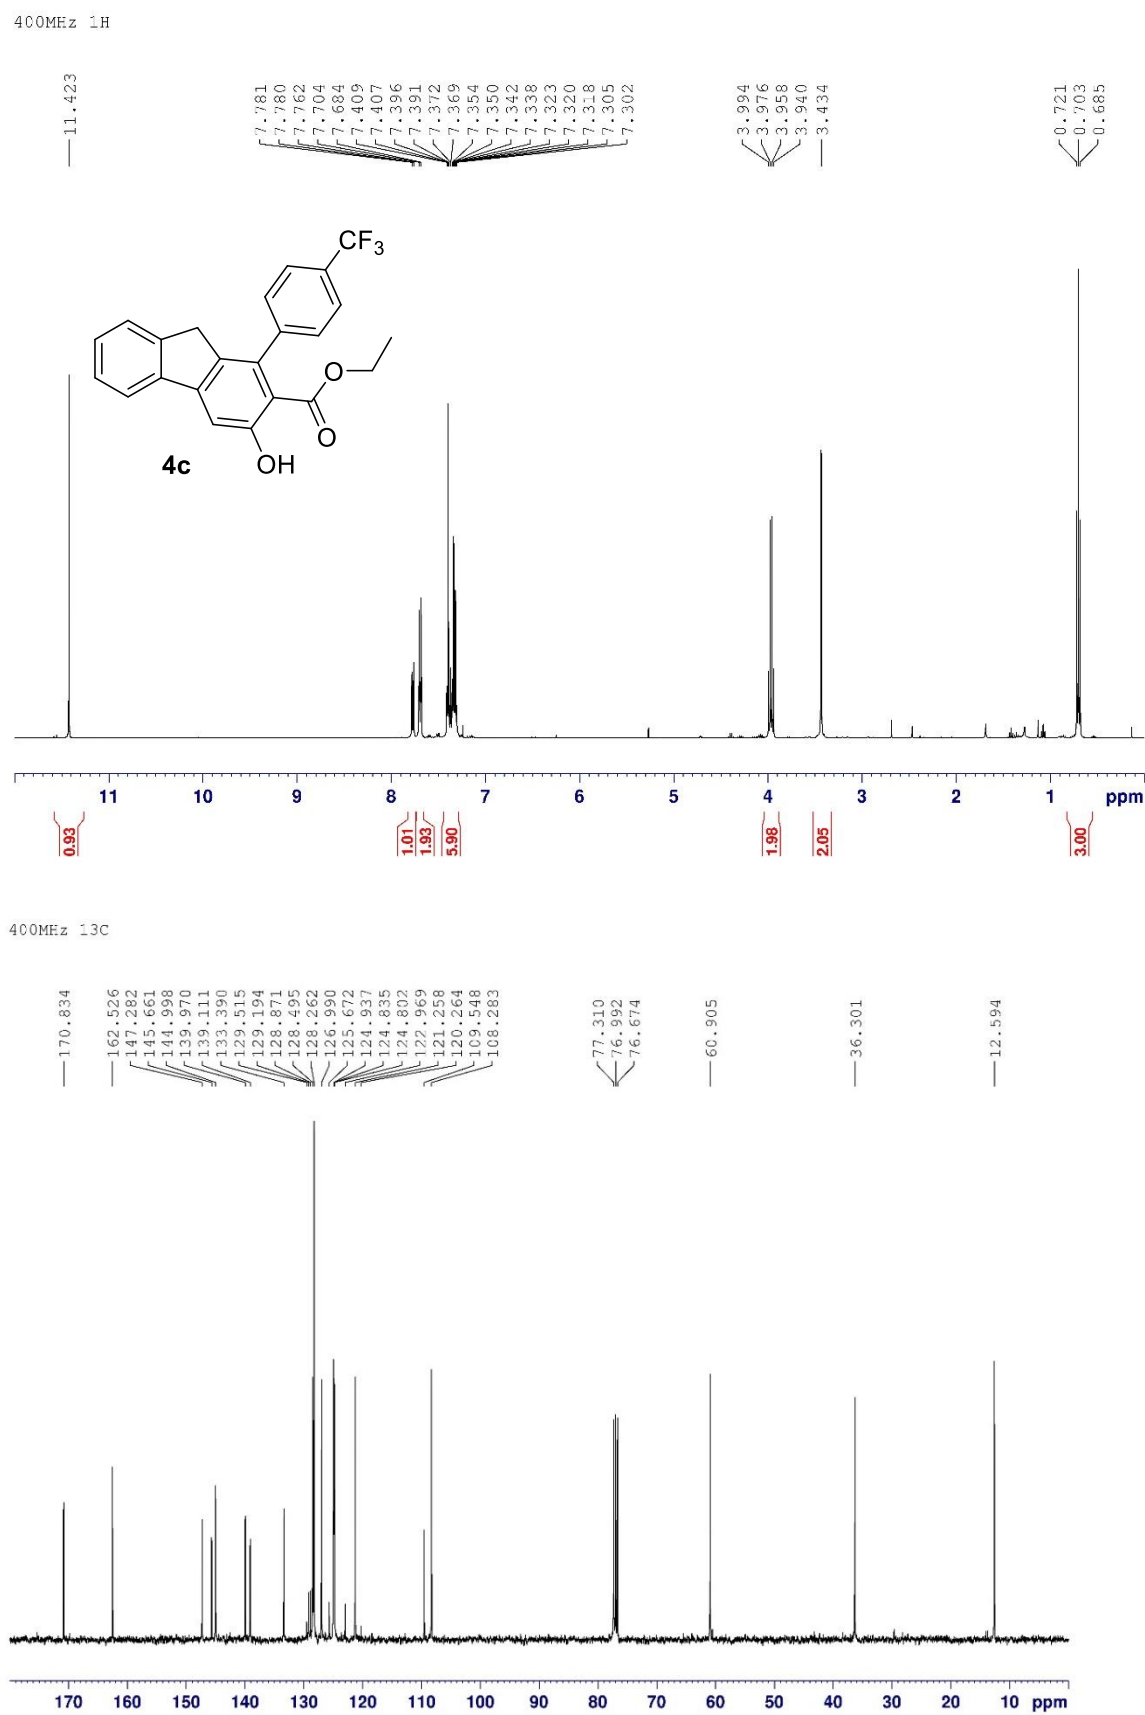

Figure S4  $^1\text{H}$  NMR and  $^{13}\text{C}$  NMR spectra of **4d**

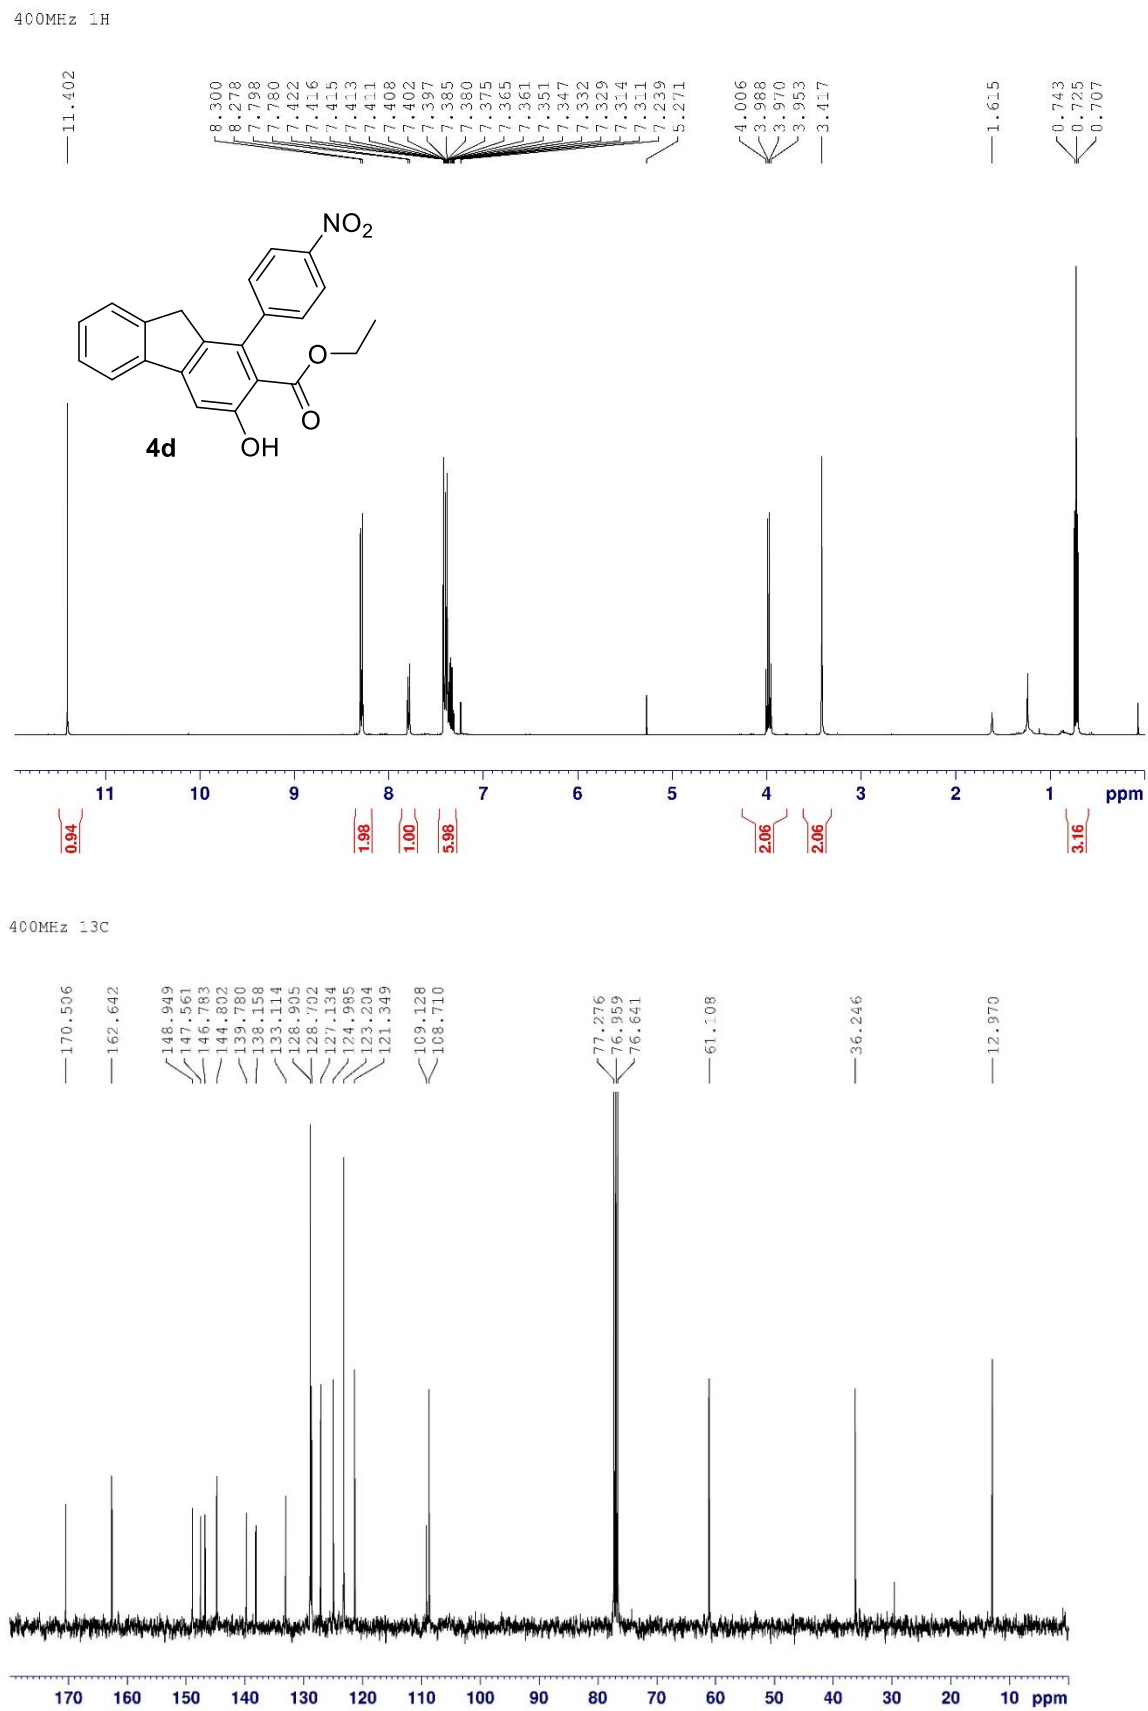

Figure S5  $^1\text{H}$  NMR and  $^{13}\text{C}$  NMR spectra of **4e**

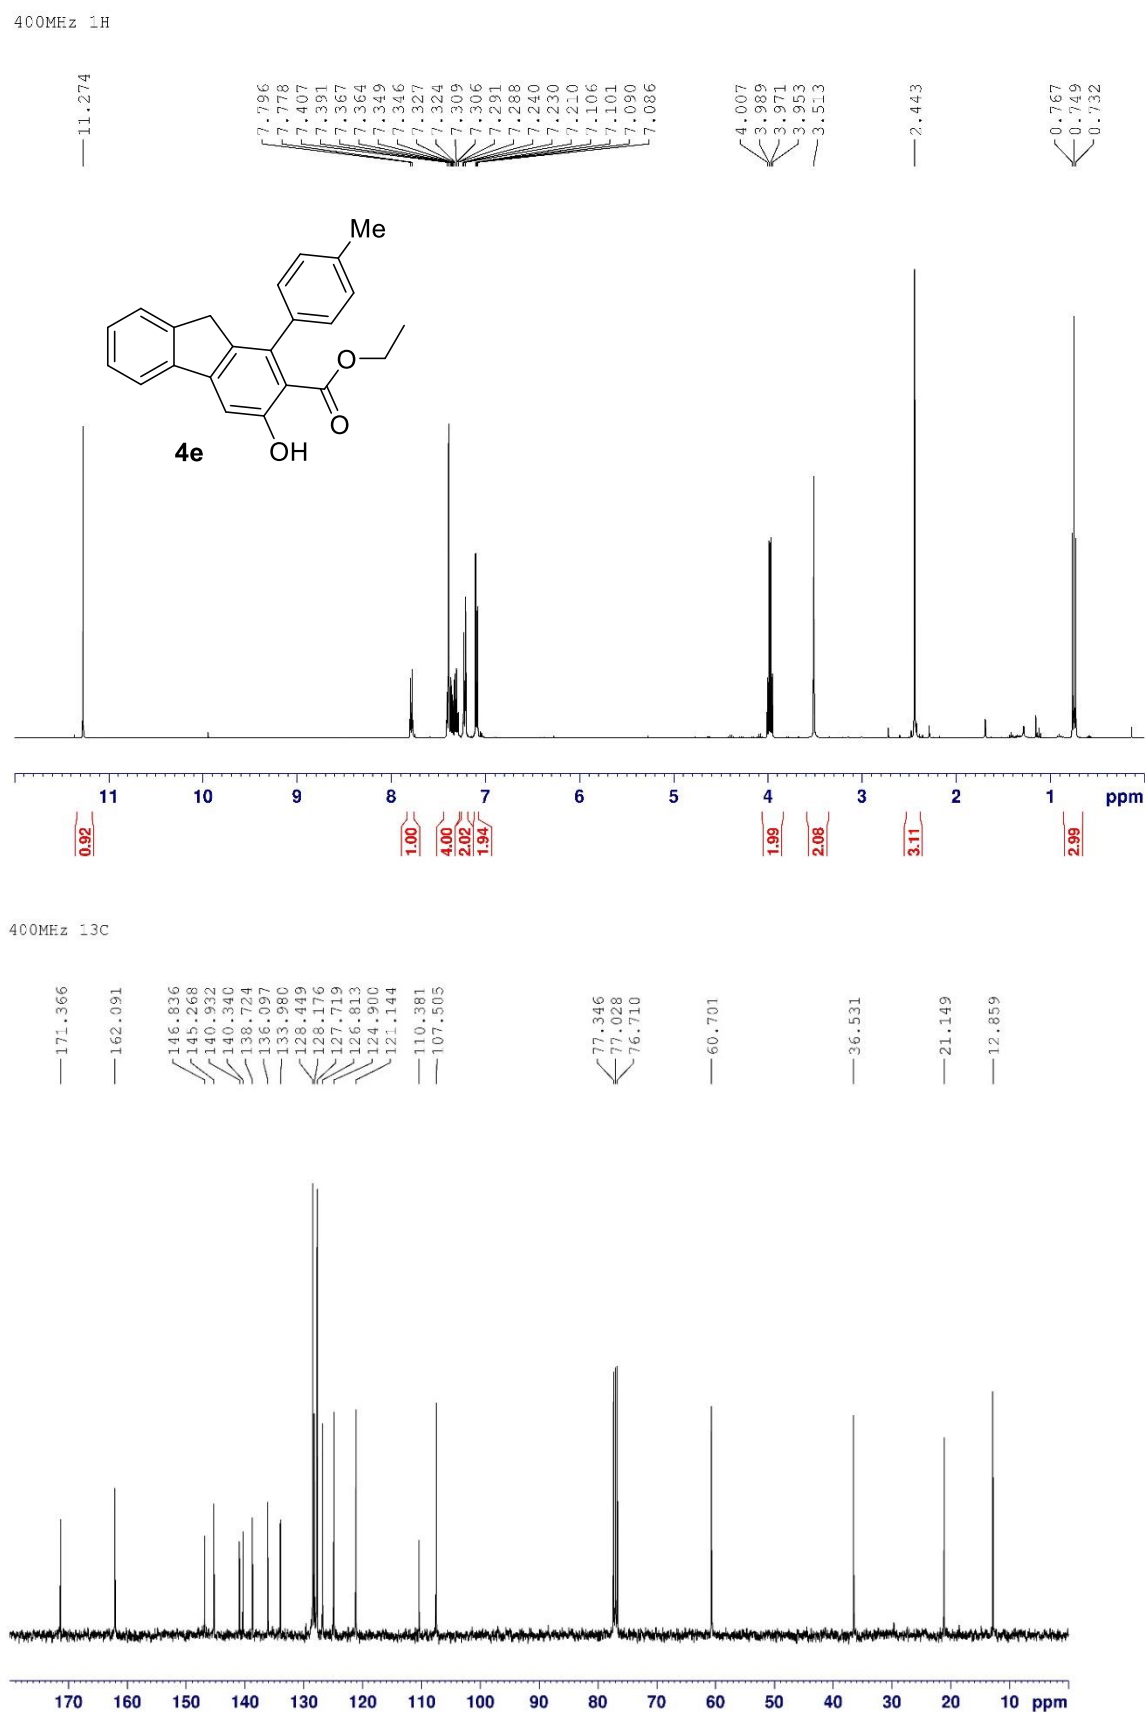



Figure S6  $^1\text{H}$  NMR and  $^{13}\text{C}$  NMR spectra of **4f**

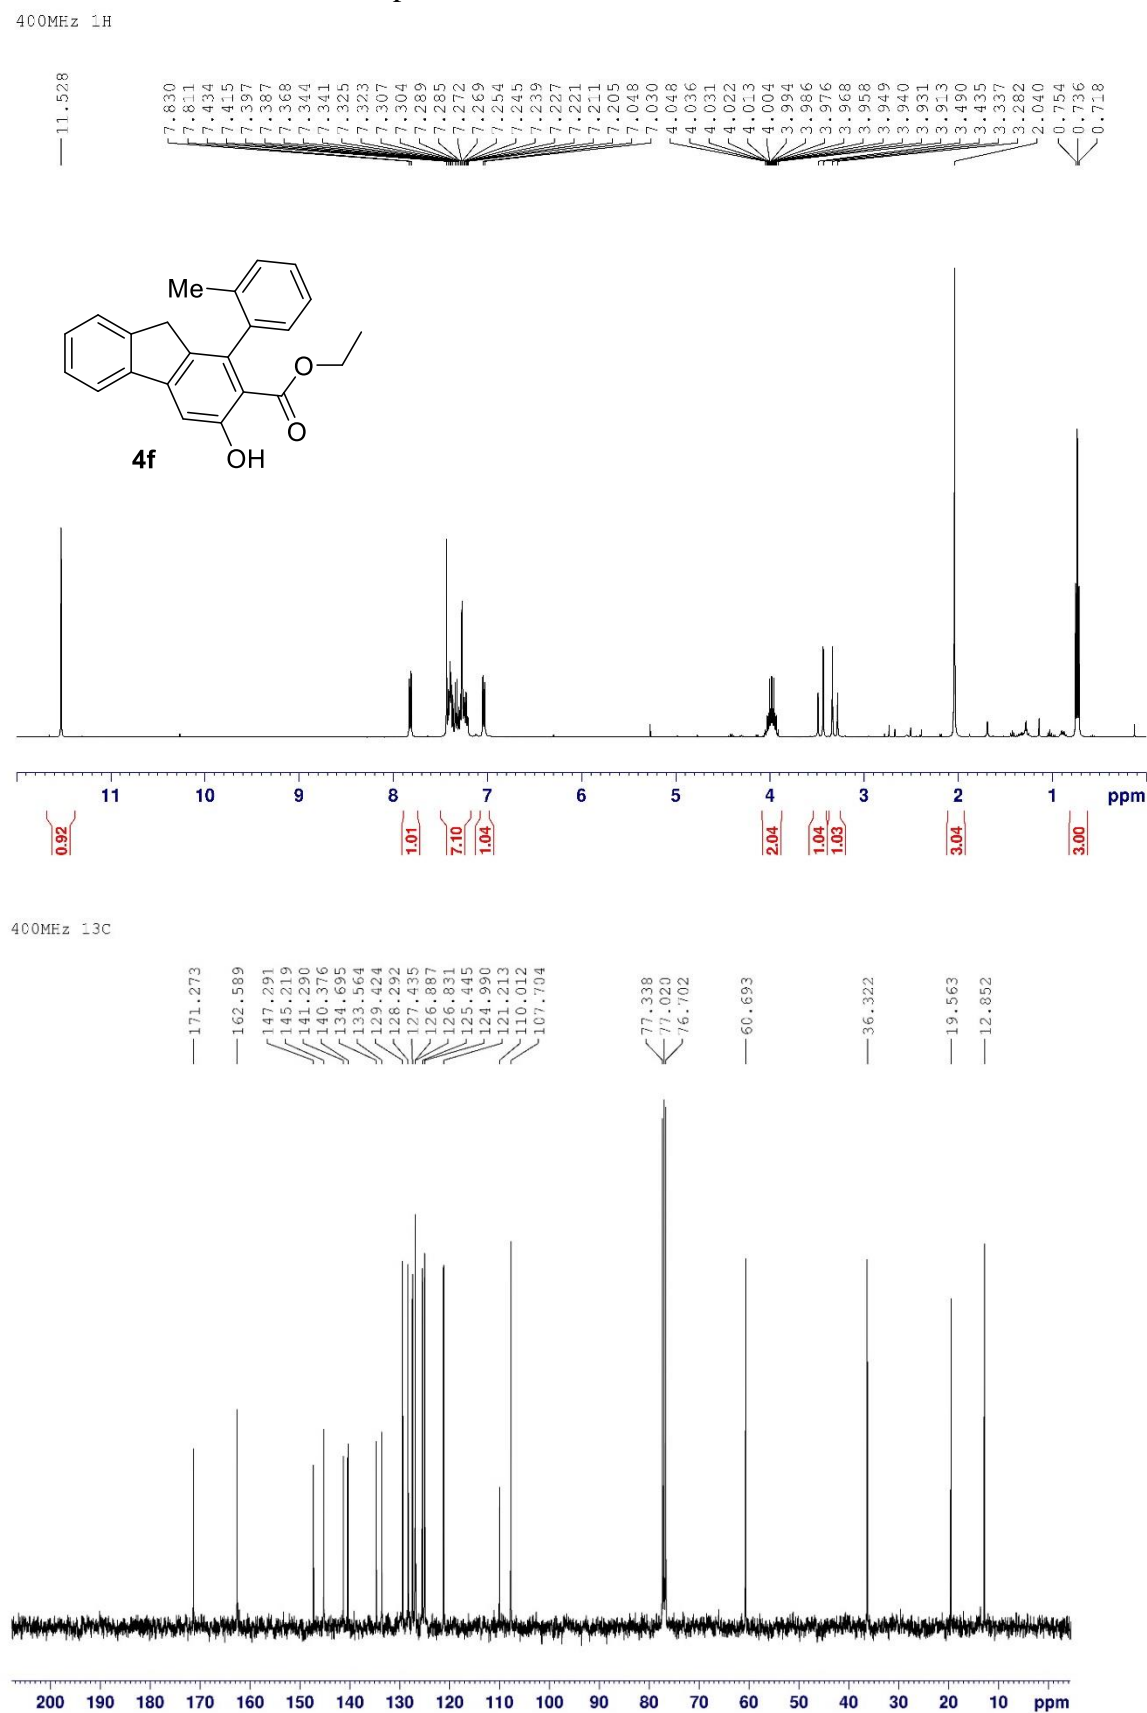

Figure S7  $^1\text{H}$  NMR and  $^{13}\text{C}$  NMR spectra of **4g**

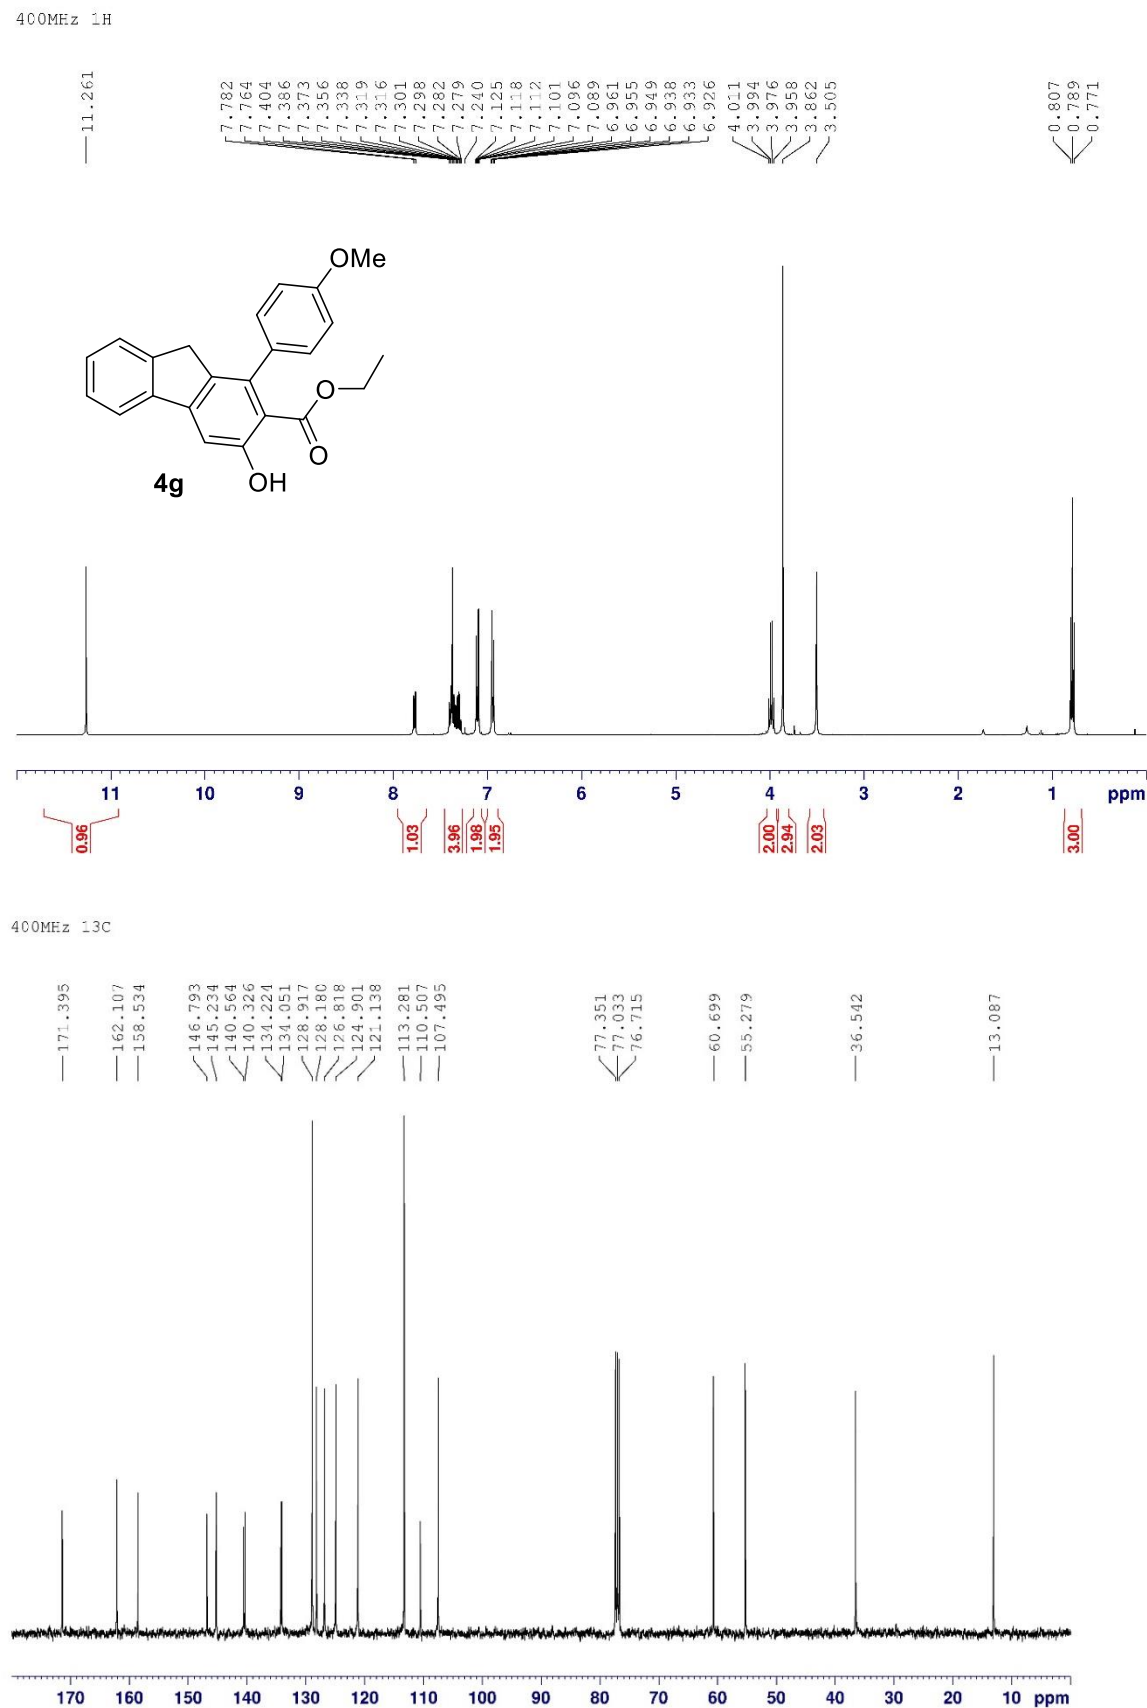

Figure S8  $^1\text{H}$  NMR and  $^{13}\text{C}$  NMR spectra of **4i**

400MHz  $^1\text{H}$

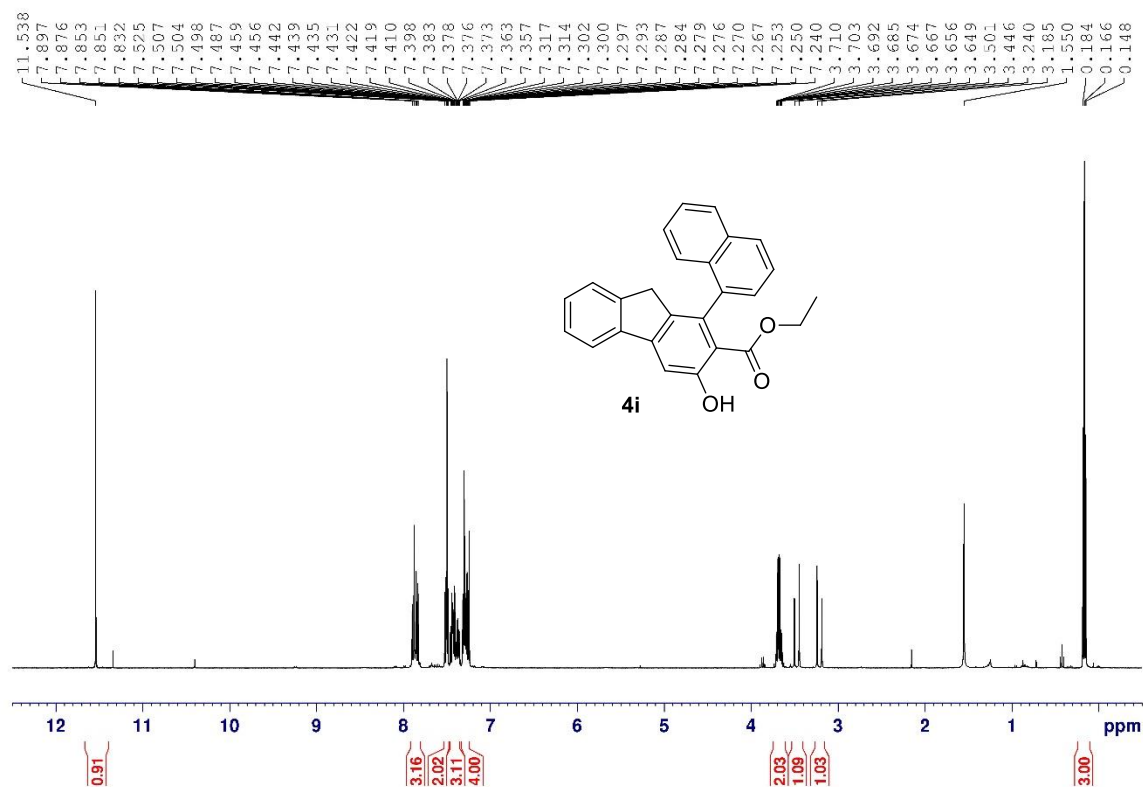

400MHz  $^{13}\text{C}$

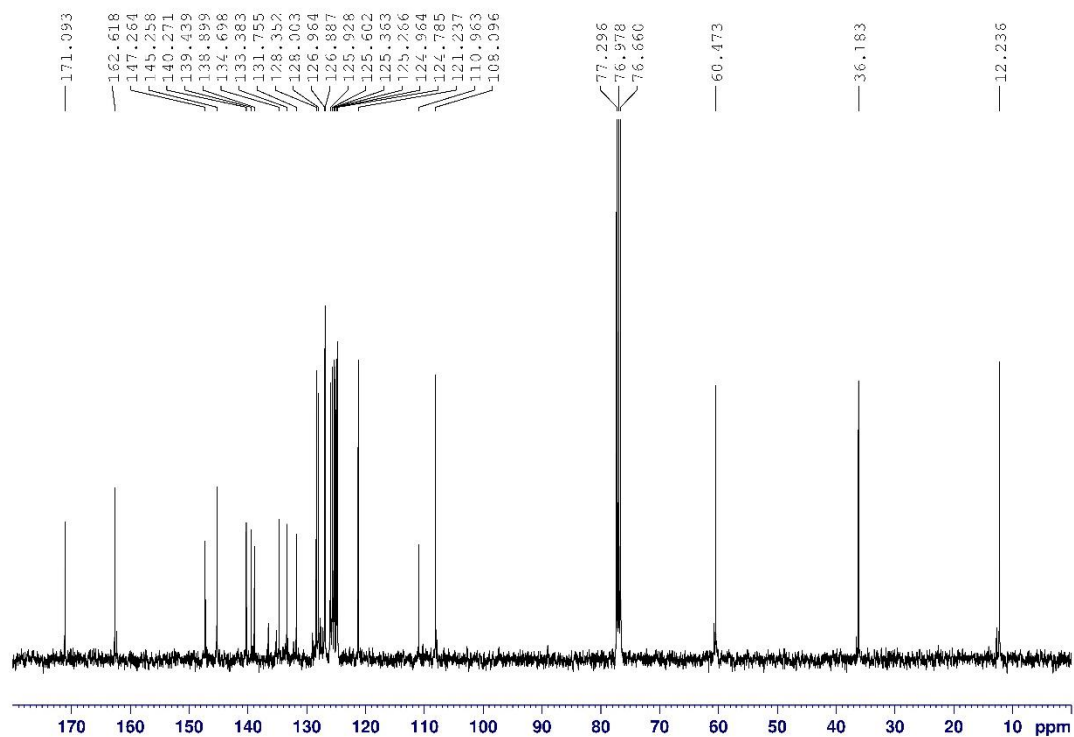

Figure S9  $^1\text{H}$  NMR and  $^{13}\text{C}$  NMR spectra of **4j**

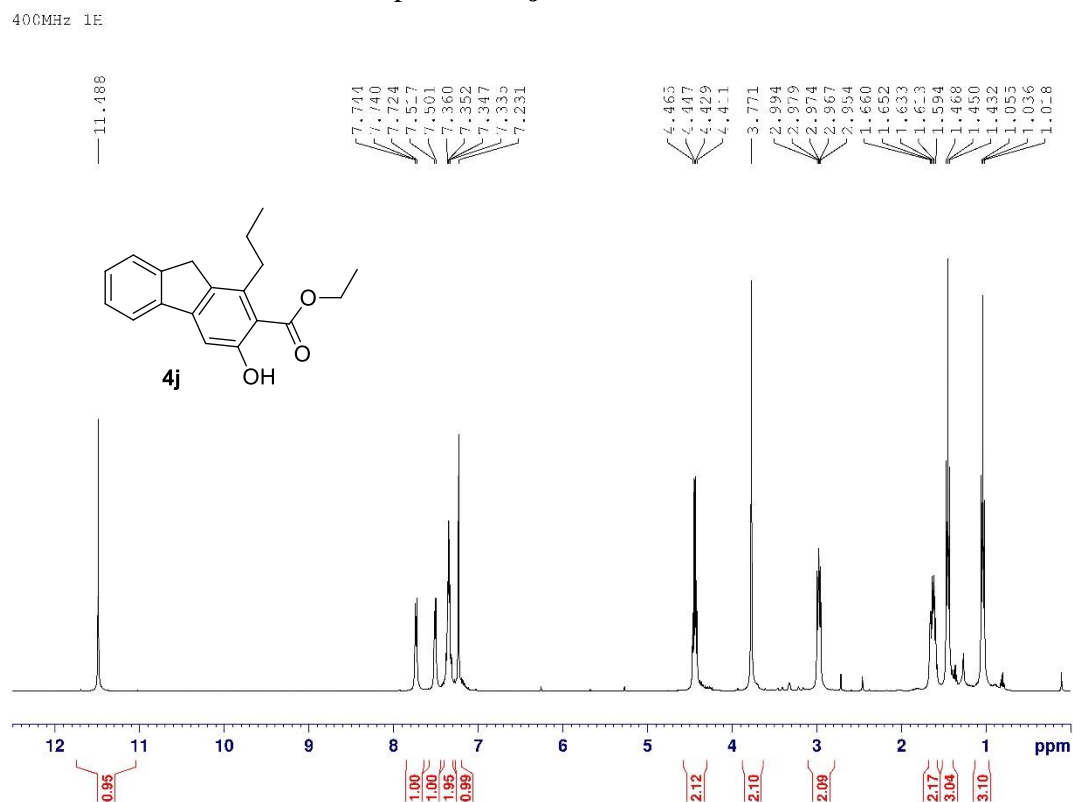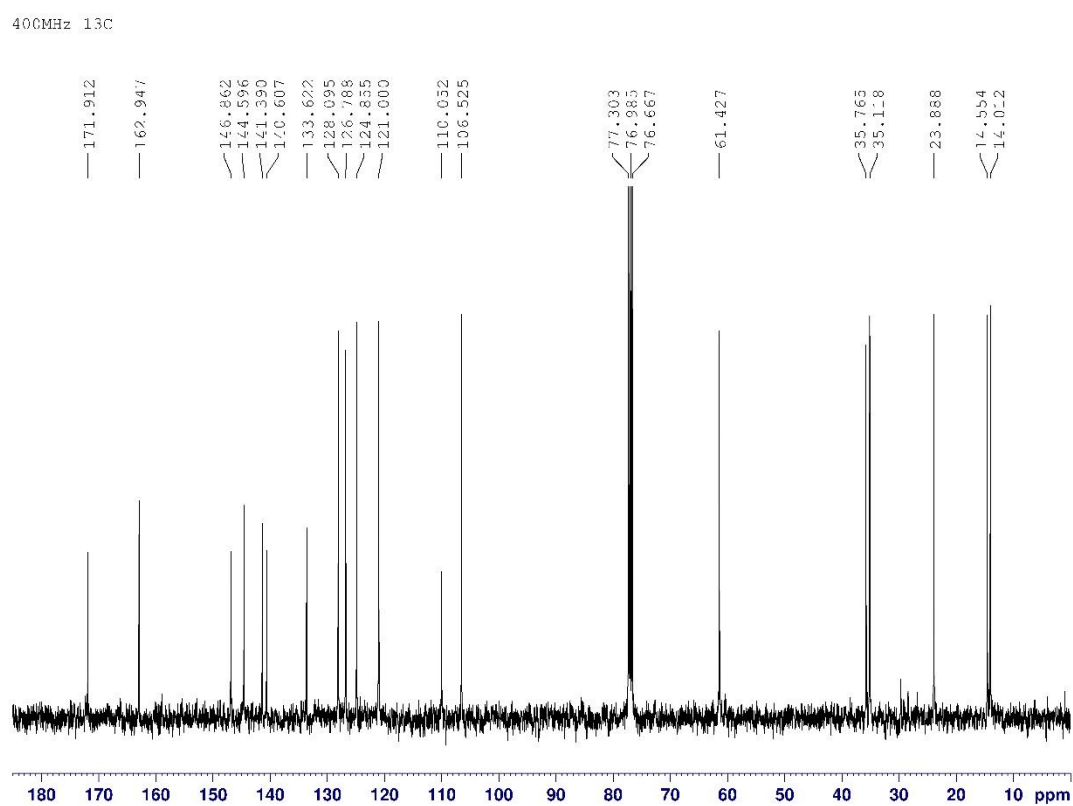

Figure S10  $^1\text{H}$  NMR and  $^{13}\text{C}$  NMR spectra of **4k**

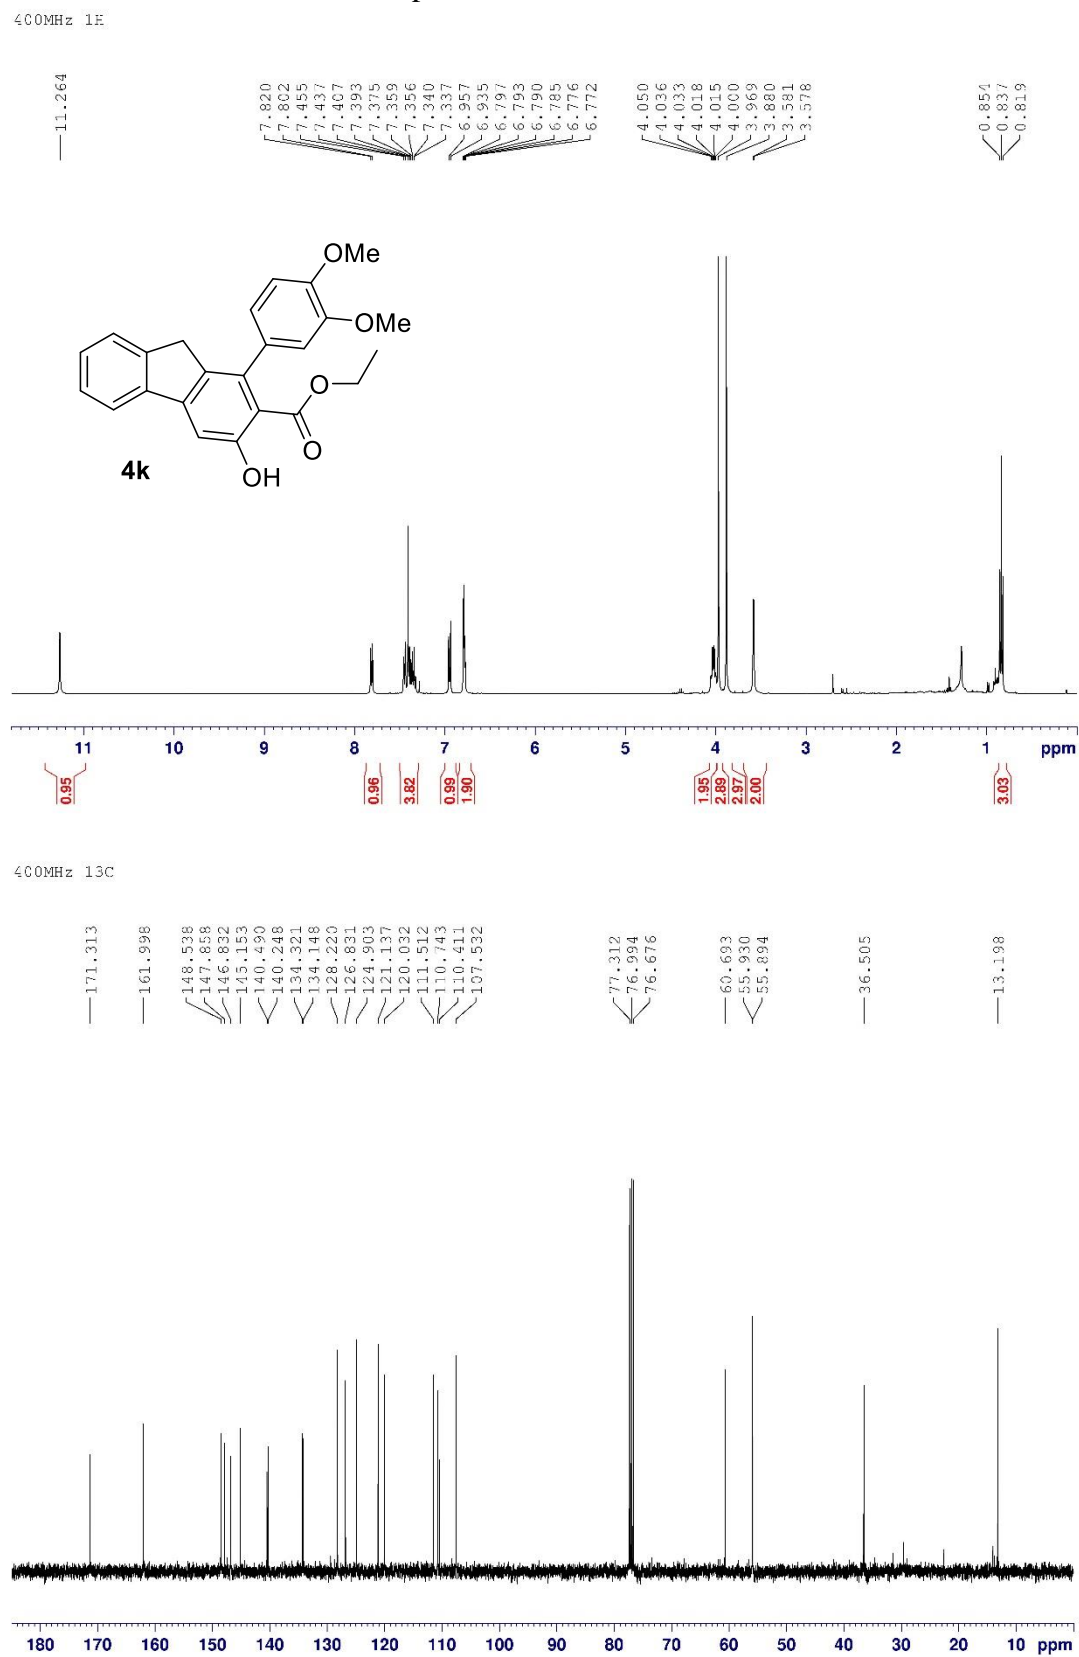

Figure S11  $^1\text{H}$  NMR and  $^{13}\text{C}$  NMR spectra of **4I**

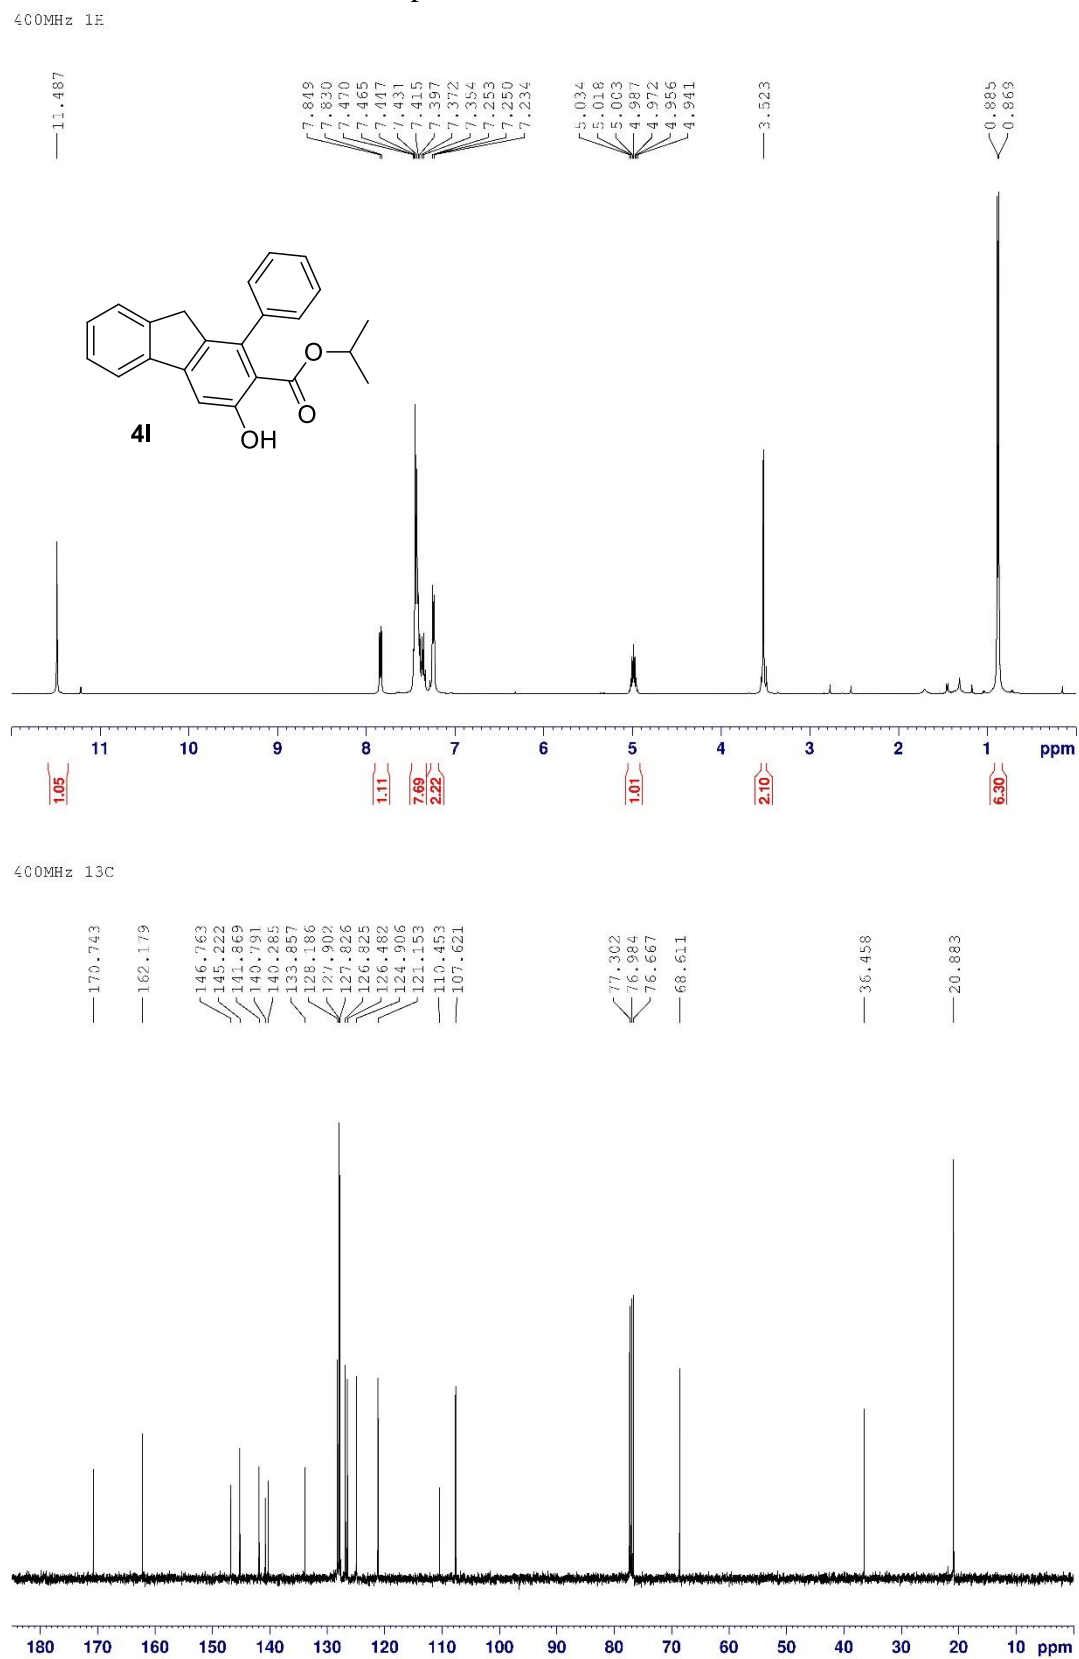

Supplement: s1 [file s1]
